# Supplementary material for: Dativeversuselectron-sharing bonding in the isoelectronic argon compounds ArR+(R = CH3, NH2, OH, and F)
Source: Royal Society of Chemistry journal article supplement (doi:10.1039/d0nj05326k), 2020-12-11
Supplement: d0nj05326k1.pdf [file d0nj05326k1.pdf]

## New Journal of Chemistry

### **Dative versus electron-sharing bonding in the isoelectronic argon compounds $\text{ArR}^+$ ( $\text{R} = \text{CH}_3, \text{NH}_2, \text{OH}, \text{F}$ )**

Zhilong Liu\*, Jing He, Ya Li, Yan Bai, Qingyang Lin, Yurong Guo<sup>§</sup>, Fuqiang Zhang,  
Haishun Wu, and Jianfeng Jia

---

*School of Chemical and Material Science, Key Laboratory of Magnetic Molecules & Magnetic Information Materials, Ministry of Education, Shanxi Normal University, Linfen, Shanxi 041004, People's Republic of China*

*E-mail address: lzling@sxnu.edu.cn*

*<sup>§</sup>Current address: Department of Chemistry, School of Science, Tianjin University, People's Republic of China.*

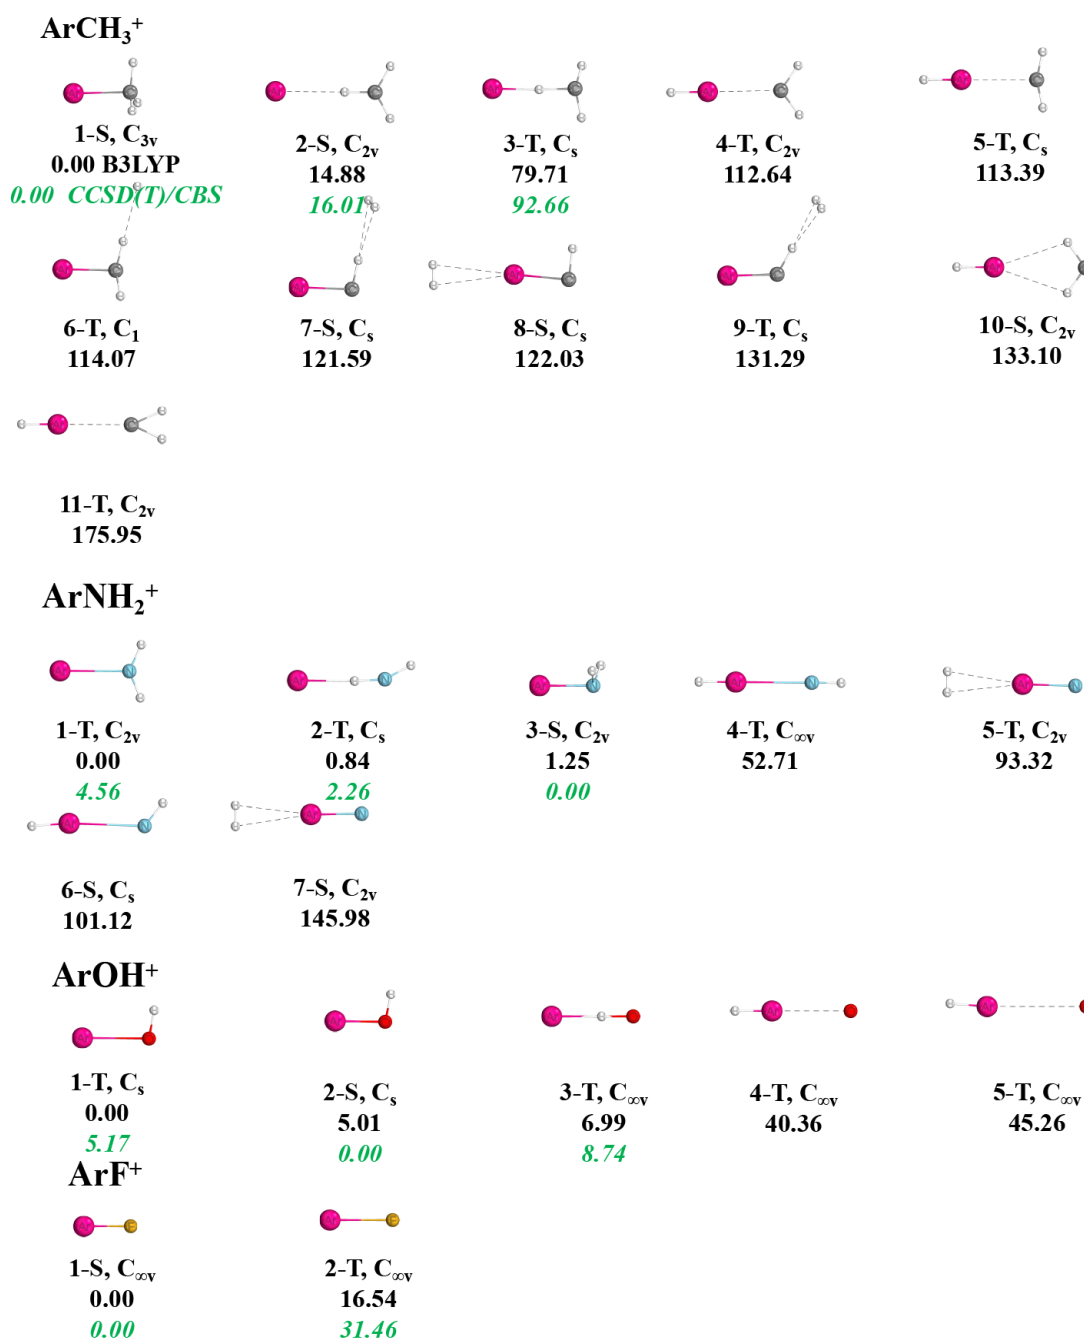

**Figure S1.** Optimized low-lying geometries of ArR<sup>+</sup> cations (R = CH<sub>3</sub>, NH<sub>2</sub>, OH, F) at the B3LYP-D3(BJ)/aug-cc-pVTZ level. The symmetries and relative energies (in kcal·mol<sup>-1</sup>) relative to the ground-state anion are indicated. The numbers in *italic* are the relative energies calculated at CCSD(T)/CBS//B3LYP-D3(BJ)/aug-cc-pVTZ level. The letters S and T behind the serial number stand for the singlet and triplet electronic states, respectively.

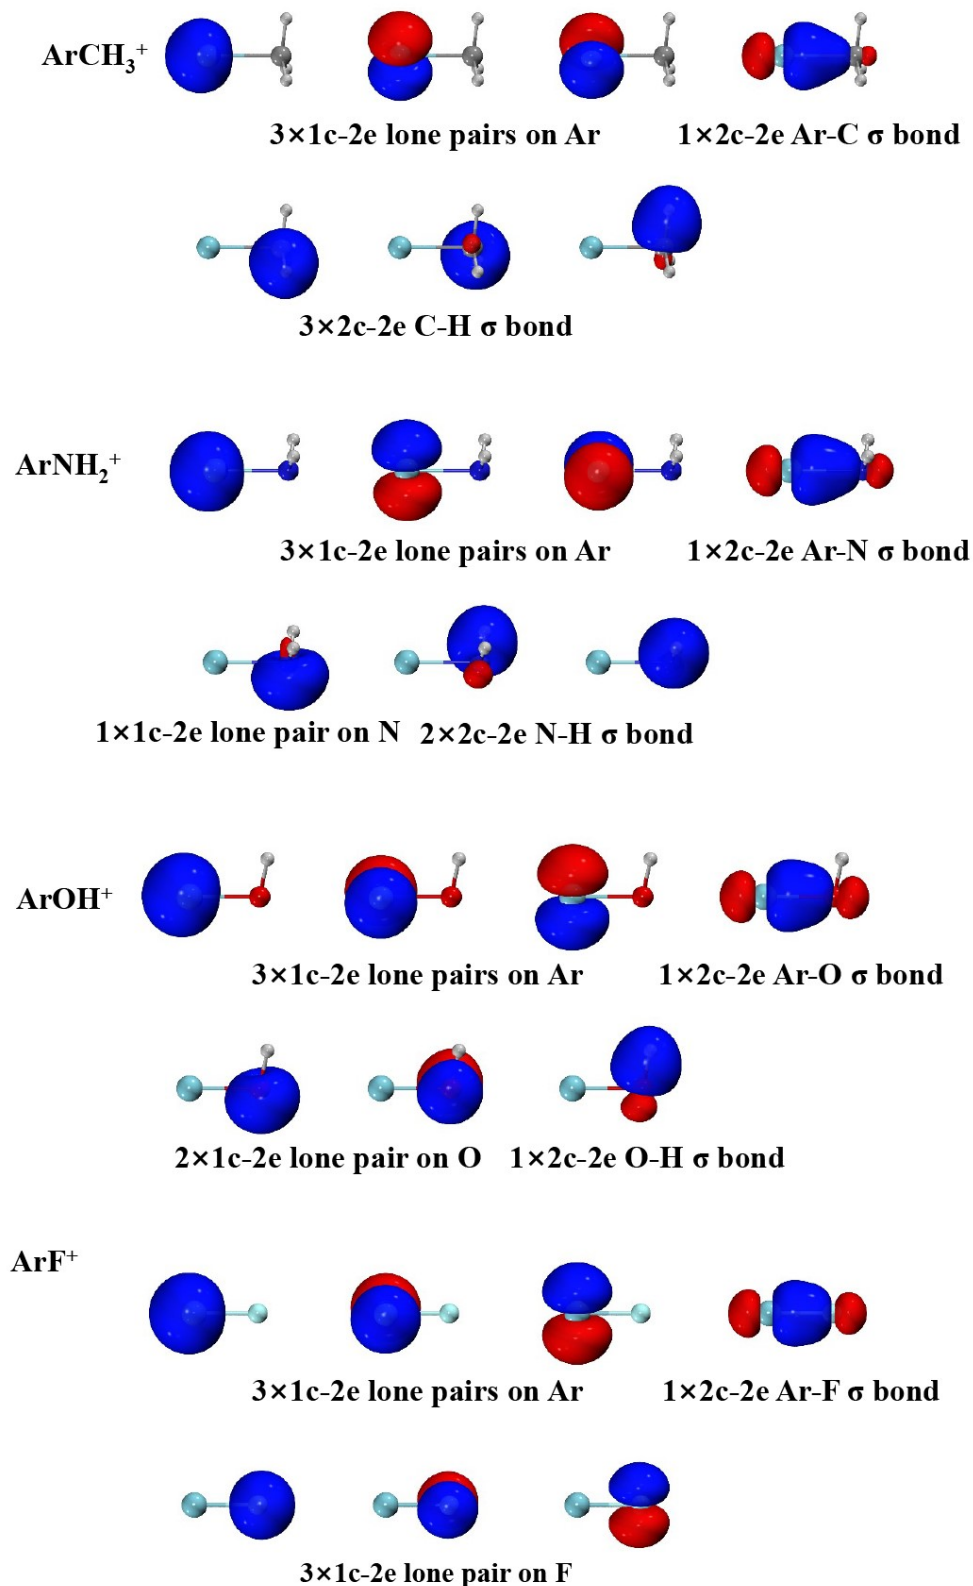

**Figure S2.** The NLMO analysis for the lowest singlet ArR<sup>+</sup> cations (R = CH<sub>3</sub>, NH<sub>2</sub>, OH, F) at the B3LYP-D3(BJ)/aug-cc-pVTZ level. (isosurface = 0.08 a.u.)

The cartesian coordinates of the lowest singlet  $\text{ArR}^+$  ( $\text{R} = \text{F}, \text{OH}, \text{NH}_2, \text{CH}_3$ ) complexes at the B3LYP-D3(BJ)/aug-cc-pVTZ level of theory.

$\text{ArCH}_3^+$

|    |                 |                 |                 |
|----|-----------------|-----------------|-----------------|
| Ar | 0.000000000000  | 0.000000000000  | 0.702254000000  |
| C  | 0.000000000000  | 0.000000000000  | -1.354393000000 |
| H  | 0.000000000000  | 1.072941000000  | -1.504737000000 |
| H  | 0.929194000000  | -0.536471000000 | -1.504737000000 |
| H  | -0.929194000000 | -0.536471000000 | -1.504737000000 |

$\text{ArNH}_2^+$

|    |                 |                 |                 |
|----|-----------------|-----------------|-----------------|
| Ar | -0.044788000000 | -0.646804000000 | 0.000000000000  |
| N  | -0.044788000000 | 1.264386000000  | 0.000000000000  |
| H  | 0.559849000000  | 1.395884000000  | 0.829016000000  |
| H  | 0.559849000000  | 1.395884000000  | -0.829016000000 |

$\text{ArOH}^+$

|    |                 |                 |                |
|----|-----------------|-----------------|----------------|
| Ar | 0.036063000000  | -0.589928000000 | 0.000000000000 |
| O  | 0.036063000000  | 1.158332000000  | 0.000000000000 |
| H  | -0.937647000000 | 1.352049000000  | 0.000000000000 |

$\text{ArF}^+$

|    |                |                |                 |
|----|----------------|----------------|-----------------|
| Ar | 0.000000000000 | 0.000000000000 | 0.544661000000  |
| F  | 0.000000000000 | 0.000000000000 | -1.089322000000 |
